# Supplementary material for: A two-dimensional molecular network structure of trimesic acid prepared by adsorption-induced self-organizationElectronic supplementary information (ESI) available: materials and methods. See http://www.rsc.org/suppdata/cc/b2/b207556c/
Source: Royal Society of Chemistry journal article supplement (doi:10.1039/b207556c), 2002-10-07
Supplement: b207556c.doc [file b207556c.doc]

# Supplementary information

**Materials and Methods**

***1. Materials***

All solutions were prepared with ultra-pure (Milli-Q, SP-TOC: > 18.2 M cm1). HClO4 (ultrapure grade, KANTO CHEMICAL Co. Ltd. Japan) was used as electrolyte solution without further purification. TMA (NAKARAI CHEMICAL Co. Ltd. Japan ) were used without further purification.

Au wire (0.8 mm in diameter) of which the purity is 99.999% was obtained from TANAKA KIKINZOKU Co. Ltd. Japan to prepare single crystal bead for electrochemical and STM measurements. Pt wire was (0.8 mm in diameter and the purity is 99.99%) also obtained from TANAKA KIKINZOKU for counter electrode and/or quasi-reference electrode.

***2. Electrochemical Scannning Tunneling Microscopy (EC-STM)***

In-situ STM measurements were carried out with a Nanoscope E (Digital Instruments, Santa Barbara, California). An Au(111) facet formed on a single crystal bead was used for STM measurements. The tunneling tip was prepared from an electrochemically etched W wire, and its side wall was sealed with transparent nail polish to reduce the faradic current. Several nail polished tips were kept in the water more than one day to check the influence of impurities for STM experiments. All images were collected in the constant current mode. The Au(111) electrodes were annealed in a H2-O2 flame and quenched in pure water saturated with H2. The electrodes were transferred into a STM cell filled with 0.1 M HClO4 aqueous solution containing 0.1 mM TMA. Two Pt wires were used as reference and counter electrode in the STM cell, respectively. All potentials are quoted with respect to a reversible hydrogen electrode (RHE).
